# Supplementary material
Source: HighWire-hosted journal article supplement (https://www.cmaj.ca/highwire/filestream/58796/field_highwire_adjunct_files/0/five-bath-1-at.pdf)
Supplement: five-bath-1-at.pdf [file five-bath-1-at.pdf]

**Appendix 1 (as supplied by the authors): Adverse effects of synthetic cathinones reported in the literature<sup>1,2</sup>**

| System           | Adverse effect reported in the literature                                                                                |
|------------------|--------------------------------------------------------------------------------------------------------------------------|
| Cardiovascular   | Hypertension, tachycardia, palpitations, S-T segment changes, chest pain, dyspnea, cardiac arrest                        |
| Gastrointestinal | Nausea, vomiting, anorexia                                                                                               |
| Neurological     | Tremors, headaches, paresthesias, bruxism, seizures                                                                      |
| Psychiatric      | Agitation, delirium, aggression, anxiety, panic, visual and auditory hallucinations, paranoid delusions                  |
| Other            | Hyponatremia, hyperthermia, diaphoresis, elevated creatine kinase, myositis, rhabdomyolysis, nasal irritation, epistaxis |

**References**

1. Prosser JM, Nelson LS. The toxicology of bath salts: a review of synthetic cathinones. *J Med Toxicol* 2012;8:33-42.
2. Winstock AR, Mitcheson LR, Deluca P, et al. Mephedrone, new kid for the chop? *Addiction* 2011;106:154-61.
